# Supplementary material
Source: PubMed Central journal article supplement (PMC7287376)
Supplement: rspb20200721supp5.pdf [file rspb20200721supp5.pdf]

## ELECTRONIC SUPPLEMENTARY MATERIAL 5

**From article:** Camacho C, Sanabria-Fernández A, Baños-Villalba A, Edelaar, P. 2020. Experimental evidence that matching habitat choice drives local adaptation in a wild population. *Proc. R. Soc. B.* DOI: <http://dx.doi.org/10.1098/rspb.2020.0721>

**Table S3.** Description of the set of models fitted to the data on substrate use (0 = pale pavement, 1 = dark asphalt) by grasshoppers captured for the first time (a) and those resighted after manipulation and release (b). Models are sorted by their degree of support from the data, as indicated by the difference in AICc of the most satisfactory model (i.e. smallest AICc) to alternative models.

| Model number                         | Model structure                                                                                         | Description of model                                                                    | $\Delta$ AICc |
|--------------------------------------|---------------------------------------------------------------------------------------------------------|-----------------------------------------------------------------------------------------|---------------|
| <b>(a) Models for first captures</b> |                                                                                                         |                                                                                         |               |
| Capture#1                            | Original colour                                                                                         | No sex effect                                                                           | 0.00          |
| Capture#2                            | Original colour + Sex                                                                                   | Parallel effect of colour in both sexes                                                 | 2.08          |
| Capture#3                            | Original colour + Sex + Original colour $\times$ Sex                                                    | All effects included, and interaction between colour and sex                            | 3.45          |
| Capture#4                            | Null                                                                                                    | Only random term                                                                        | 62.18         |
| Capture#5                            | Sex                                                                                                     | No colour effect                                                                        | 64.18         |
| <b>(b) Models for resightings</b>    |                                                                                                         |                                                                                         |               |
| Resight#1                            | Original colour + New colour                                                                            | No effect of time since manipulation                                                    | 0.00          |
| Resight#2                            | Original colour + New colour + Time since manipulation                                                  | All effects included, no interaction                                                    | 2.46          |
| Resight#3                            | New colour                                                                                              | Neither original colour nor time since manipulation effects                             | 3.69          |
| Resight#4                            | Original colour + New colour + Time since manipulation<br>+ New colour $\times$ Time since manipulation | All effects included, and interaction between new colour<br>and time since manipulation | 4.28          |
| Resight#5                            | New colour + Time since manipulation                                                                    | No effect of original colour                                                            | 6.04          |
| Resight#6                            | Null                                                                                                    | Only random terms                                                                       | 15.82         |
| Resight#7                            | Original colour                                                                                         | Neither new colour nor time since manipulation effects                                  | 17.08         |
| Resight#8                            | Time since manipulation                                                                                 | Neither original colour nor new colour effects                                          | 17.83         |
| Resight#9                            | Original colour + Time since manipulation                                                               | No effect of new colour                                                                 | 19.13         |

AICc, Akaike Information Criterion corrected for small sample sizes. All models described above included the random term (1|Sampling date). Models for resightings (b) also included the random term (1|ID).
